# Supplementary material for: Review on cybersickness in applications and visual displays
Source: Springer Nature journal article supplement (doi:10.1007/s10055-016-0285-9), 2016-04-26
Supplement: 10055_2016_285_MOESM1_ESM.pdf [file 10055_2016_285_MOESM1_ESM.pdf]

## Virtual Reality

### Review on Cybersickness in Applications and Visual Displays

Lisa Rebenitsch, rebenitsch@msoe.edu, Milwaukee School of Engineering

Charles Owen, cbowen@msu.edu, Michigan State University

#### CYBERSICKNESS DETECTION METHODS PUBLICATIONS

| <i>Author</i>              | <i>Duration in minutes (Participants)</i> | <i>Detection Method</i>       | <i>Results</i>                                                                                                                                               |
|----------------------------|-------------------------------------------|-------------------------------|--------------------------------------------------------------------------------------------------------------------------------------------------------------|
| (Chardonnet et al. 2015)   | presumably around 10 (17)                 | Postural                      | Area, length, left-right length, forwards-backwards length, slope, and speed variance increase in variance increases with symptoms                           |
| (Bos et al. 2013)          | 74 (19)                                   | Postural                      | Increase in standard deviation for both lateral and for-aft direction with a low-pass filter of 0.1HZ                                                        |
| (Chang et al. 2013)        | 10 (12)                                   | Physiological                 | Delta and theta EEG power increase with cybersickness stimuli while alpha and beta decrease                                                                  |
| (Bruck and Watters 2011)   | NA(18)                                    | Questionnaire                 | The SSQ and anxiety questionnaires have four main factor groups                                                                                              |
| (Keshavarz and Hecht 2011) | 16-19 (126)                               | Questionnaire                 | A verbal one-point scale of 0-20 one feelings of sickness is well correlated to the SSQ-T and the SSQ-N                                                      |
| (Dong and Stoffregen 2010) | 40 (26)                                   | Postural and Control          | Passengers sicker than drivers; drivers moved side-to-side more than passengers for head and torso; for-aft movement varied more for passengers than drivers |
| (Villard et al. 2008)      | 4, 10 min. each, 2 min. breaks (12)       | Postural and Real vs. Virtual | Incidence and severity of symptoms in virtual room nearly identical to actual room                                                                           |
| (Watanabe and Ujike 2008)  | 10 (18)                                   | Navigation and Physiological  | Disorientation increases with vertical navigation; no significant effect on total SSQ; correlation with heart rate ratio and duration                        |
| (Bouchard et al. 2007)     | Varies (371)                              | Questionnaire                 | Redesigned SSQ to have 2 subcategories                                                                                                                       |
| (Harvey and Howarth 2007)  | 15 (18)                                   | Physiological                 | VE exposure causes postural instability; women had greater changes in stability over time                                                                    |
| (Kiryu et al. 2007b)       | 10 (15)                                   | Physiological                 | LF/HF (blood pressure and respiration) increased with exposure time                                                                                          |

| <i>Author</i>                 | <i>Duration in minutes<br/>(Participants)</i> | <i>Detection Method</i> | <i>Results</i>                                                                                                                                   |
|-------------------------------|-----------------------------------------------|-------------------------|--------------------------------------------------------------------------------------------------------------------------------------------------|
| (Oyamada <i>et al.</i> 2007)  | 5 (7)                                         | Physiological           | Averaged LF/HF gradually increased with respect to the elapsed time; duration increased symptoms                                                 |
| (Smart <i>et al.</i> 2007)    | Varied                                        | Postural                | Varied according to viewed stimulus                                                                                                              |
| (Young <i>et al.</i> 2007)    | 30 (30)                                       | Questionnaire           | In the moving room 23% became ill, in the simulator 43% became ill, in the projector system, 17% became ill, and 42% percent became ill in a HMD |
| (Roberts and Gallimore 2005)  | 60 (10)                                       | Physiological           | Increase in tachyastria power during exposure                                                                                                    |
| (Kim <i>et al.</i> 2004)      | 9.5 (61)                                      | Physiological           | Found correlation with gastric tachyarrhythmia, eye blink rate, respiration rate, respiratory sinus arrhythmia, and heart period                 |
| (Hakkinen <i>et al.</i> 2002) | 60 (60)                                       | Postural                | Postural sway and symptoms higher for HMD 3D game than HMD or normal movie; difference lasted for 30 after the stimulus                          |
| (Cobb 1999)                   | 20 (40)                                       | Postural                | Static and dynamic posture tests not statistically significant                                                                                   |
| (Stanney <i>et al.</i> 1999)  | 30 (34)                                       | Space Judgment          | Significant shift error for vertical pointing location                                                                                           |
| (Golding 1998)                | NA(147)                                       | Questionnaire           | Simplified the Motion Sickness Susceptibility Questionnaire                                                                                      |
| (Kennedy <i>et al.</i> 1993)  | NA (NA)                                       | Questionnaire           | Developed the Simulator Sickness Questionnaire                                                                                                   |
