# Supplementary material for: Review on cybersickness in applications and visual displays
Source: Springer Nature journal article supplement (doi:10.1007/s10055-016-0285-9), 2016-04-26
Supplement: 10055_2016_285_MOESM2_ESM.pdf [file 10055_2016_285_MOESM2_ESM.pdf]

## Virtual Reality

### Review on Cybersickness in Applications and Visual Displays

Lisa Rebenitsch, rebenitsch@msoe.edu, Milwaukee School of Engineering

Charles Owen, cbowen@msu.edu, Michigan State University

#### VISUAL DISPLAY SYSTEM CYBERSICKNESS PUBLICATIONS

| <i>Author</i>             | <i>Display System</i> | <i>Duration in Minutes (Participants)</i> | <i>Item of Examination</i> | <i>Results</i>                                                                                                                                   |
|---------------------------|-----------------------|-------------------------------------------|----------------------------|--------------------------------------------------------------------------------------------------------------------------------------------------|
| (Rebenitsch 2015)         | Multiple              | 24 (24)                                   | Display                    | No effect of the display if the independent visual background, navigation, and field of view are considered                                      |
| (Kim et al. 2014)         | Multiple              | 40-70 (53)                                | Display                    | HMD worse than CAVE condition, and CAVE worse than desktop                                                                                       |
| (Vlad et al. 2013)        | Multiple              | 18 (102)                                  | Display                    | A stereoscopic HMD has higher cybersickness than a stereoscopic monitor                                                                          |
| (Moss and Muth 2011)      | HMD                   | 12 (80)                                   | Display                    | No peripheral vision increases symptoms                                                                                                          |
| (Liu and Uang 2011)       | Multiple              | Less than 15 (60)                         | Display                    | HMD worse than regular monitor; No difference between stereoscopic monitor and HMD                                                               |
| (Keshavarz et al. 2011)   | Multiple              | 18 (51,39,20)                             | Display                    | A large screen with the same FOV as a HMD results in more cybersickness; peripheral view increases cybersickness                                 |
| (Sharples et al. 2008)    | Multiple              | 30m(71)                                   | Display                    | HMD associated with the strongest symptoms                                                                                                       |
| (Villard et al. 2008)     | Large screen          | 4, 10 min. each w/ 2 min. breaks (12)     | Real vs. Virtual           | Incidence and severity of symptoms in virtual room nearly identical to actual room                                                               |
| (Watanabe and Ujike 2008) | CAVE (4 wall)         | 10 (18)                                   | Navigation                 | Disorientation increases with vertical navigation; no significant effect on total SSQ;                                                           |
| (Smart et al. 2007)       | Multiple              | Varied                                    | Postural                   | In the moving room 23% became ill, in the simulator 43% became ill, in the projector system, 17% became ill, and 42% percent became ill in a HMD |
| (Young et al. 2007)       | HMD                   | 30 (30)                                   | Questionnaire              | Pretests increase post immersion SSQ scores; immersion has a significant effect                                                                  |

| <i>Author</i>                                    | <i>Display System</i> | <i>Duration in Minutes (Participants)</i> | <i>Item of Examination</i> | <i>Results</i>                                                                                                                               |
|--------------------------------------------------|-----------------------|-------------------------------------------|----------------------------|----------------------------------------------------------------------------------------------------------------------------------------------|
| (Duh <i>et al.</i> 2004)                         | HMD, Dome             | Not specified (11, 9, 10)                 | Rotation                   | Frequency negatively correlated with instability whether it be screen or screen/chair combination                                            |
| (Hakkinen <i>et al.</i> 2002)                    | HMD and Desktop       | 60 (60)                                   | Display Mode Effects       | Postural sway and symptoms higher for HMD stereoscopic game than HMD movie or normal movie. The difference lasted for 30 after the stimulus. |
| (Draper <i>et al.</i> 2001a)                     | HMD                   | 30 (11) w/ FOV and (10) w/ lag            | Field of View              | Decrease in symptoms with correct external and internal fields of view ratio                                                                 |
| (Jaeger and Mourant 2001)                        | HMD                   | 13-23 (60)                                | Navigation                 | Walking navigation had significantly less symptoms than mouse navigation                                                                     |
| (Lo and So 2001)                                 | HMD                   | 20 (16)                                   | Rotation                   | Rotation increases symptoms; rotation axis does not matter                                                                                   |
| (So <i>et al.</i> 2001b)                         | HMD                   | 30 (96, 12 each)                          | Navigation                 | Speed has a main effect but gets overshadowed by duration eventually                                                                         |
| (Nichols <i>et al.</i> 2000) (second experiment) | HMD                   | 20 (20)                                   | Symptom Profile            | Negative correlation with improving the “interface” and all subscales and total SSQ categories; no correlation with enjoyment                |
| (Stanney <i>et al.</i> 1999)                     | HMD                   | 30 (34)                                   | Space Judgment             | Significant shift error for vertical pointing location but not horizontal                                                                    |
