# Supplementary material for: Review on cybersickness in applications and visual displays
Source: Springer Nature journal article supplement (doi:10.1007/s10055-016-0285-9), 2016-04-26
Supplement: 10055_2016_285_MOESM3_ESM.pdf [file 10055_2016_285_MOESM3_ESM.pdf]

## Virtual Reality

### Review on Cybersickness in Applications and Visual Displays

Lisa Rebenitsch, rebenitsch@msoe.edu, Milwaukee School of Engineering

Charles Owen, cbowen@msu.edu, Michigan State University

#### RENDERING MODE CYBERSICKNESS PUBLICATIONS

| <i>Author</i>                | <i>Stereoscopic /<br/>Monoscopic / Bi-ocular</i> | <i>Duration in minutes<br/>(Participants)</i> | <i>Item of<br/>Examination</i> | <i>Results</i>                                                                                                                                              |
|------------------------------|--------------------------------------------------|-----------------------------------------------|--------------------------------|-------------------------------------------------------------------------------------------------------------------------------------------------------------|
| (Rebenitsch 2015)            | Monoscopic and Bi-ocular                         | 24 (22)                                       | Display Mode Effects           | Stereoscopic rendering affects the likelihood of becoming cybersick, but not how severe                                                                     |
| (Wibirama and Hamamoto 2014) | Stereoscopic                                     | 5 (20)                                        | Eye Vergence and Accommodation | Fixing the gaze depth decreases cybersickness                                                                                                               |
| (Vlad et al. 2013)           | Stereoscopic                                     | 18 (102)                                      | Eye Vergence and Accommodation | Focusing on the realism increases strain on the eyes as does focusing on the depth of an object in an image.                                                |
| (Naqvi et al. 2013)          | Stereoscopic and Monoscopic                      | 10 (23)                                       | Display Mode Effects           | Stereoscopic movies has more symptoms than monoscopic movies                                                                                                |
| (Keshavarz and Hecht 2012)   | Stereoscopic and Monoscopic                      | 15 (79)                                       | Display Mode Effects           | Real stereoscopic video of a rollercoaster had higher cybersickness than a stereoscopic rendering of a 3D model of the rollercoaster or monoscopic versions |
| (Liu and Ung 2011)           | Stereoscopic and Monoscopic                      | Less than 10 (60)                             | Display Mode Effects           | HMD worse than regular monitor; 3D monitor near significantly worse than regular monitor; No difference between 3D monitor and HMD                          |
| (Yang and Sheedy 2011)       | Stereoscopic and Monoscopic                      | 90 (21)                                       | Eye Vergence and Accommodation | Vergence and accommodation were farther from ideal in stereoscopic setting than monoscopic conditions                                                       |
| (Keshavarz et al. 2011)      | Monoscopic and Bi-ocular                         | 18 (51,39,20)                                 | Display Mode Effects           | No difference between monoscopic and bi-ocular                                                                                                              |
| (van Emmerik et al. 2011)    | Monoscopic                                       | 50 (40, 22)                                   | Field of View                  | Decrease in postural stability, increase in symptoms with congruent external and internal fields of view                                                    |
| (Moss and Muth 2011)         | Monoscopic                                       | 12 (80)                                       | Field of View and Display      | No peripheral vision increases symptoms                                                                                                                     |

| <i>Author</i>                 | <i>Stereoscopic /<br/>Monoscopic / Bi-ocular</i> | <i>Duration in minutes<br/>(Participants)</i> | <i>Item of<br/>Examination</i>           | <i>Results</i>                                                                                                                                                                              |
|-------------------------------|--------------------------------------------------|-----------------------------------------------|------------------------------------------|---------------------------------------------------------------------------------------------------------------------------------------------------------------------------------------------|
| (Bos <i>et al.</i> 2010)      | Monoscopic                                       | 50 (20)                                       | Field of View                            | Increase of external field of view and difference between internal and external fields of view have statistically significant effect on symptoms                                            |
| (Toet <i>et al.</i> 2008)     | Monoscopic                                       | 50 (20)                                       | Field of View                            | Congruent fields of view increased symptoms more than incongruent                                                                                                                           |
| (Oyamada <i>et al.</i> 2007)  | Stereoscopic                                     | 5 (7)                                         | Physiological                            | Varied according to viewed stimulus                                                                                                                                                         |
| (Harvey and Howarth 2007)     | Monoscopic                                       | 15 (18)                                       | Field of View and Physiological          | Symptoms increased with screen size and people got sick sooner; skin temperature rose, but it was not significant                                                                           |
| (Hale and Stanney 2006)       | Stereoscopic                                     | 60 (46)                                       | Stereoscopic Ability Effects             | No difference in symptoms with stereoscopic disparity                                                                                                                                       |
| (Hakkinen <i>et al.</i> 2002) | Bi-ocular and Stereoscopic                       | 60 (60)                                       | Display Mode Effects                     | Postural sway and symptoms higher for HMD stereoscopic game than HMD movie or normal movie; the difference lasted for 30 after the stimulus; susceptibility had no statistical significance |
| (Lin <i>et al.</i> 2002)      | Stereoscopic                                     | 2 each trial (10)                             | Field of View                            | Symptoms increased with field of view                                                                                                                                                       |
| (Seay <i>et al.</i> 2002)     | Stereoscopic and Monoscopic                      | Not specified (156)                           | Field of View, Control, and Display Mode | Larger field of view increased nausea; interaction between testable items limits the implication of the results; nothing conclusive on monoscopic versus stereo                             |
| (Duh <i>et al.</i> 2001c)     | Monoscopic                                       | Not specified (10)                            | Field of View                            | Increasing FOV increased symptoms                                                                                                                                                           |
| (Draper <i>et al.</i> 2001a)  | Monoscopic                                       | 30 (11) for FOV and (10) for lag              | Field of View                            | Decrease in symptoms with correct external and internal fields of view ratio                                                                                                                |
| (Stanney <i>et al.</i> 1999)  | Stereoscopic                                     | 30 (34)                                       | Space Discernment Detection              | Significant shift error for vertical pointing location but not horizontal                                                                                                                   |

| <i>Author</i>                      | <i>Stereoscopic /<br/>Monoscopic / Bi-ocular</i>   | <i>Duration in minutes<br/>(Participants)</i> | <i>Item of<br/>Examination</i>                  | <i>Results</i>                                                                                                                                                                               |
|------------------------------------|----------------------------------------------------|-----------------------------------------------|-------------------------------------------------|----------------------------------------------------------------------------------------------------------------------------------------------------------------------------------------------|
| (Kolasinski and Gilson 1998)       | Stereoscopic                                       | 20 (40)                                       | Interpupillary Distance and Duration of Effects | 14/40 had long terms (over an hour) symptoms; correlation between IPD and eyestrain                                                                                                          |
| (Mon-Williams <i>et al.</i> 1998 ) | Not specified                                      | Not specified(6)                              | Eye Heterophoria                                | Heterophoria varies with eye angle; on average the small error was at 34° below ear-eye line                                                                                                 |
| (Mon-Williams and Wann 1998)       | Stereoscopic and Bi-ocular (overlap not specified) | 10 (28)                                       | Eye Heterophoria                                | No difference among bi-ocular, small range stereo, and voluntary focus stereo; increases in illness symptoms, visual acuity and distance heterophoria for stereoscopic with continuous focus |
| (Ehrlich 1997)                     | Stereoscopic and Bi-ocular                         | Until completion (36)                         | Display Mode Effects                            | SSQ-N was higher for stereoscopic than bi-ocular                                                                                                                                             |
| (Mon-Williams <i>et al.</i> 1995)  | Stereoscopic and Bi-ocular                         | 10 (20)                                       | Eye Heterophoria                                | Stereoscopic displays had all but one had increases in heterophoria after 10m; bi-ocular displays had little effect after 30m                                                                |
