# Supplementary material for: Review on cybersickness in applications and visual displays
Source: Springer Nature journal article supplement (doi:10.1007/s10055-016-0285-9), 2016-04-26
Supplement: 10055_2016_285_MOESM4_ESM.pdf [file 10055_2016_285_MOESM4_ESM.pdf]

## Virtual Reality

### Review on Cybersickness in Applications and Visual Displays

Lisa Rebenitsch, rebenitsch@msoe.edu, Milwaukee School of Engineering

Charles Owen, cbowen@msu.edu, Michigan State University

#### APPLICATION CYBERSICKNESS PUBLICATIONS

| <i>Author</i>                | <i>Duration in Minutes<br/>(Participants)</i> | <i>Design Aspect</i> | <i>Results</i>                                                                                                                                                            |
|------------------------------|-----------------------------------------------|----------------------|---------------------------------------------------------------------------------------------------------------------------------------------------------------------------|
| (Freitag et al. 2016)        | 20-30(87)                                     | Rotation Gain        | Increasing the gain of rotation may increase cybersickness at large percentages                                                                                           |
| (Serge and Moss 2015)        | 16 (12)                                       | Navigation           | Viewing an environment with the joystick are higher if participants view a translation free virtual environment immediately prior                                         |
| (Budhiraja 2015)             | 10 (10)                                       | Blur                 | Adding motion blur may help cybersickness prone participants                                                                                                              |
| (Plouzeau et al. 2015)       | 12-30 (18)                                    | Navigation           | Adding vibration to mimic walking decreases cybersickness                                                                                                                 |
| (Dorado and Figueroa 2014)   | 2 (44)                                        | Navigation           | Ramps have less cybersickness than stairs                                                                                                                                 |
| (Llorach et al. 2014).       | 12 (55, 61)                                   | Navigation           | Walking navigation has less cybersickness than a traditional game pad                                                                                                     |
| (Chen et al. 2013).          | 4-10 (20)                                     | Navigation           | Head/body controlled interfaces perform better and have lower cybersickness than joystick navigation given the same degree of freedom                                     |
| (Chen <i>et al.</i> 2012)    | 30 (7)                                        | Rotation             | Scene oscillations are not correlated to nausea but are to vection                                                                                                        |
| (Liu and Uang 2012)          | 5, 10, 15, or 20 (32)                         | Rotation             | A gradual increase in cybersickness with increasing rotation speed, reaching significant between 15 and 60 degrees; no effect with an inclination about the lateral axis. |
| (Golding <i>et al.</i> 2012) | 10 minutes with 15 minute breaks (12, 22)     | Scene Orientation    | Unlikely scenes (inverted) cause less cybersickness than likely scenes (upright)                                                                                          |
| (Chen and So 2011)           | 15 (32)                                       | Navigation           | No significant dominant axis of translation                                                                                                                               |
| (Chen <i>et al.</i> 2011)    | 50 (23)                                       | Control              | Drivers experience fewer symptoms than passengers with the same viewpoint                                                                                                 |

| <i>Author</i>                | <i>Duration in Minutes (Participants)</i> | <i>Design Aspect</i>           | <i>Results</i>                                                                                                                                                                           |
|------------------------------|-------------------------------------------|--------------------------------|------------------------------------------------------------------------------------------------------------------------------------------------------------------------------------------|
| (Dong <i>et al.</i> 2011)    | 40 (26)                                   | Control                        | Drivers experience fewer symptoms than passengers with the same viewpoint                                                                                                                |
| (Moss and Muth 2011)         | 12 (80)                                   | Display                        | No peripheral vision increases symptoms                                                                                                                                                  |
| (Keshavarz and Hecht 2011)   | 15 (61)                                   | Rotation                       | Pitch with roll and three axis rotation conditions produces more cybersickness than the pitch axis alone; the difference between two and three axes rotation did not reach significance. |
| (Ling <i>et al.</i> 2011)    | 5 (14)                                    | Anxiety                        | Anxiety is correlated to cybersickness.                                                                                                                                                  |
| (Liu and Uang 2011)          | Less than 10 (60)                         | Depth Cues                     | Higher depth cues increase cybersickness on monitors, and substantially less so on HMDs                                                                                                  |
| (Dong and Stoffregen 2010)   | 40 (26)                                   | Postural Detection and Control | Passenger sicker than drivers; drivers moved side-to-side more than passengers for head and torso; for-aft movement varied more for passengers than drivers                              |
| (Bonato <i>et al.</i> 2009)  | 5 (19)                                    | Rotation                       | Rotating both the pitch and roll axes increases symptoms more than just one                                                                                                              |
| (Watanabe and Ujike 2008)    | 10 (18)                                   | Navigation and Physiological   | Disorientation increases with vertical navigation; no significant effect on total SSQ; correlation with heart rate ratio and duration                                                    |
| (Diels <i>et al.</i> 2007)   | 10 (12)                                   | Focus Point Effects            | Higher in gaze shifting than focusing at the center and unrestricted viewing; higher in non center-fixation than in unrestricted viewing                                                 |
| (Merhi <i>et al.</i> 2007)   | 50 (24 or 9)                              | Posture Effects                | Standing increases symptoms verbs sitting                                                                                                                                                |
| (Clemes and Howarth 2005)    | 20 (48)                                   | Menstrual cycle effect         | Hormonal levels of the cycle do affect symptom severity                                                                                                                                  |
| (Duh <i>et al.</i> 2004)     | Not specified (11, 9, 10)                 | Rotation                       | Frequency negatively correlated with instability whether it be screen or screen/chair combination                                                                                        |
| (Stanney <i>et al.</i> 2002) | 15, 30, 45, 60 (320 and 320)              | Control and Scene Complexity   | Higher level of control increases nausea symptoms; scene content did not significantly affect symptoms                                                                                   |
| (Duh <i>et al.</i> 2001b)    | Not specified (9)                         | Independent Visual Background  | Having a independent visual background improved stability; type of IVB showed no effect                                                                                                  |

| <i>Author</i>                                    | <i>Duration in Minutes (Participants)</i> | <i>Design Aspect</i>          | <i>Results</i>                                                                                                                                                                                                                                       |
|--------------------------------------------------|-------------------------------------------|-------------------------------|------------------------------------------------------------------------------------------------------------------------------------------------------------------------------------------------------------------------------------------------------|
| (Duh <i>et al.</i> 2001d)                        | Not specified (8)                         | Independent Visual Background | No effect with roll frequency; having a IVB improved stability<br>Significant interaction with frequency and IVB                                                                                                                                     |
| (Jaeger and Mourant 2001)                        | 13-23 (60)                                | Navigation                    | Walking navigation had significantly less symptoms than mouse navigation;                                                                                                                                                                            |
| (Kingdon <i>et al.</i> 2001)                     | 15, 30, 45, or 60 (1028)                  | Symptom Profile               | Users with emetic response had significantly higher disorientation, nausea and total ratings and lower sense of presence                                                                                                                             |
| (Lo and So 2001)                                 | 20 (16)                                   | Rotation                      | Duration and rotation increases symptoms, rotation axis does not matter                                                                                                                                                                              |
| (So <i>et al.</i> 2001a)                         | 30 (36)                                   | Navigation                    | Increase with scene velocity in for-aft and yaw directions                                                                                                                                                                                           |
| (So <i>et al.</i> 2001b)                         | 30 (96, 12)                               | Navigation                    | Speed has a main effect but gets overshadowed by duration eventually                                                                                                                                                                                 |
| (Nichols <i>et al.</i> 2000) (second experiment) | 20 (20)                                   | Symptom Profile               | Negative correlation with improving the “interface” and all subscales and total SSQ categories; no correlation with enjoyment and symptoms                                                                                                           |
| (Howarth and Finch 1999)                         | 20 (14)                                   | Navigation                    | Head tracking causes more nausea than hand controlled navigation                                                                                                                                                                                     |
| (Howarth 1999)                                   | Not specified (31,37,40)                  | Interpupillary Distance       | No statistically significant result                                                                                                                                                                                                                  |
| (So and Lo 1999)                                 | 20 (16)                                   | Rotation                      | Nausea ratings increased for all axis; no difference between axis                                                                                                                                                                                    |
| (Singer <i>et al.</i> 1998)                      | Varied(32)                                | Duration of Effects           | All mid, post higher than pre-experiment symptoms; only disorientation higher than pre-experiment after waiting period                                                                                                                               |
| (Stanney and Hash 1998)                          | 30 (24)                                   | Control                       | Active-passive SSQ-N was lower than the passive control; active-passive and active SSQ-O was lower than passive control; the active-passive SSQ-D was lower than passive control; active-passive and active SSQ total was lower than passive control |
| (Stanney and Kennedy 1998)                       | 15, 30, or 45 (60)                        | Duration of Effects           | All SSQ scores persistent for over an hour after exposure                                                                                                                                                                                            |
| (So and Lo 1998)                                 | 20 (16)                                   | Rotation                      | Yaw rotation increases symptoms, no rotation has no symptom; HMD’s do not have a claustrophobia effect                                                                                                                                               |

| <i>Author</i>                    | <i>Duration in Minutes<br/>(Participants)</i>                          | <i>Design Aspect</i>                | <i>Results</i>                                                                                                                                                                |
|----------------------------------|------------------------------------------------------------------------|-------------------------------------|-------------------------------------------------------------------------------------------------------------------------------------------------------------------------------|
| (Dizio and Lackner<br>1997)      | 6, 2 min. each w/ 1 or 15<br>min. break, (21)                          | Field of View                       | Halving the FOV also halved the symptoms with a 200ms delay                                                                                                                   |
| (Prothero <i>et al.</i><br>1997) | 2, 3 min. each (15); 2, 4.5<br>min. each (21), both w/ 5<br>min. break | Independent<br>Visual<br>Background | First experiment's SSQ and stance breaks lower in see-through (IVB)<br>condition; second experiment showed no difference for the condition on<br>SSQ but did on stance breaks |
